# Supplementary material for: BAP1 regulation of the key adaptor protein NCoR1 is critical for γ-globin gene repression
Source: PubMed Central journal article supplement — Genes Dev. 2018 Dec 1;32(23-24):1537–49. doi: 10.1101/gad.318436.118 (PMC6295165; doi:10.1101/gad.318436.118), 2018-12-01
Supplement: supp_gad.318436.118_Supplemental_Fig_S1_S9.pdf [file supp_gad.318436.118_Supplemental_Fig_S1_S9.pdf]

# Figure S1

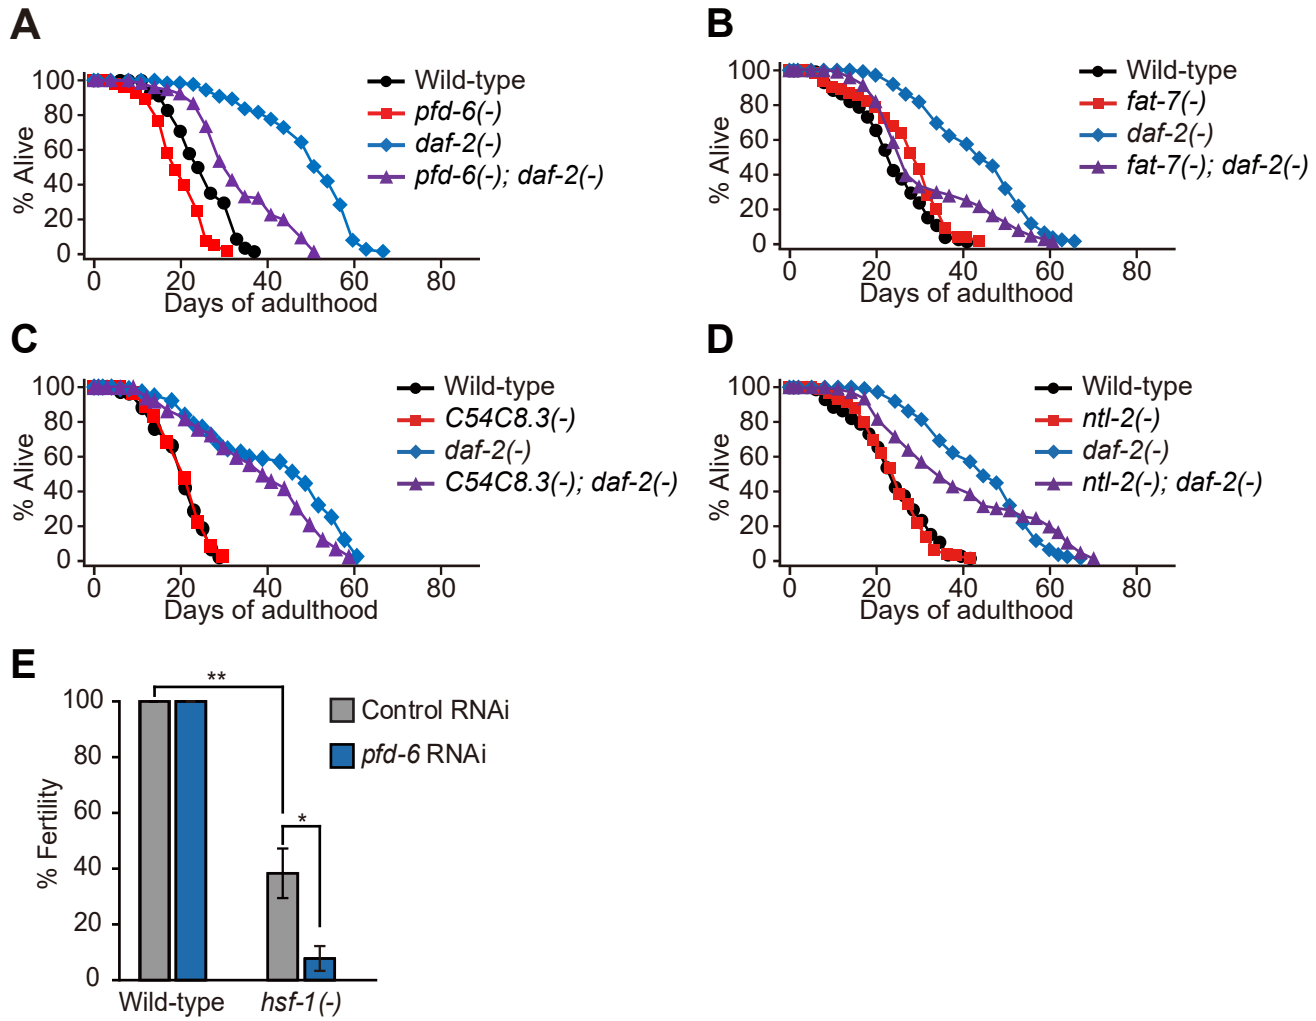

**Figure S1. The effects of mutations in *pfid-6*, *fat-7*, *C54C8.3* or *ntl-2* on lifespan and those of *pfid-6* RNAi on fertility. (A and B) *pfid-6(gk493446)* (*pfid-6(-)*) (A) or *fat-7(wa36)* (*fat-7(-)*) (B) mutations partially suppressed the long lifespan of *daf-2(e1370)* (*daf-2(-)*) mutant animals. (C and D) *C54C8.3(gk896531)* (*C54C8.3(-)*) (C) or *ntl-2(gk390728)* (*ntl-2(-)*) (D) mutations had small or no effects on the lifespan of wild-type or *daf-2(-)* animals. See **Supplemental Table S2** for statistical analysis and additional repeats. (E) Fertility of wild-type and *hsf-1(sy441)* (*hsf-1(-)*) mutant worms treated with control RNAi or *pfid-6* RNAi on solid plates (three biological repeats). Error bars represent SEM (two-tailed Student's *t*-test, \**p* < 0.05, \*\**p* < 0.01).**

# Figure S2

**A**

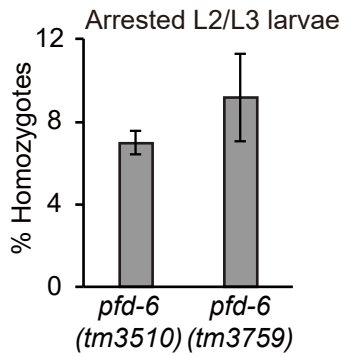

**B**

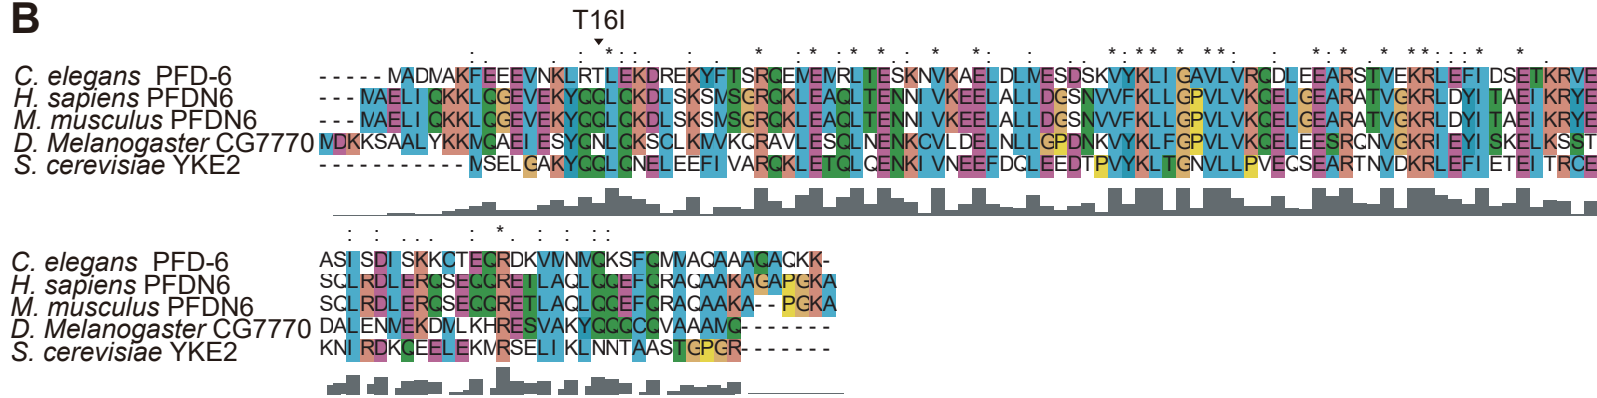

**C**

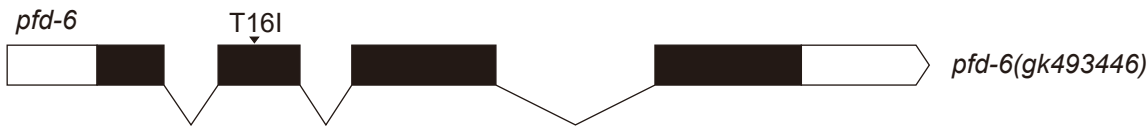

**D**

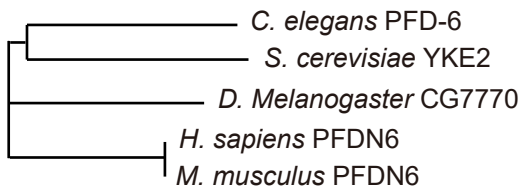

**E**

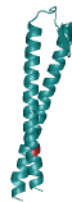

**F**

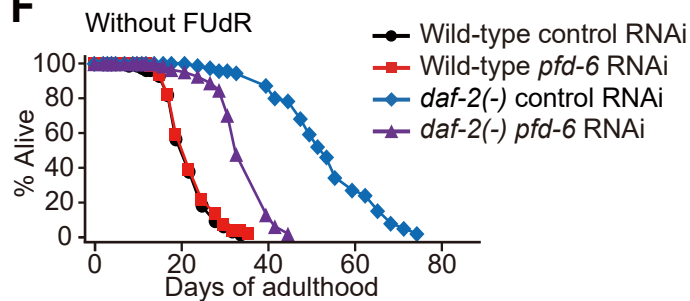

**G**

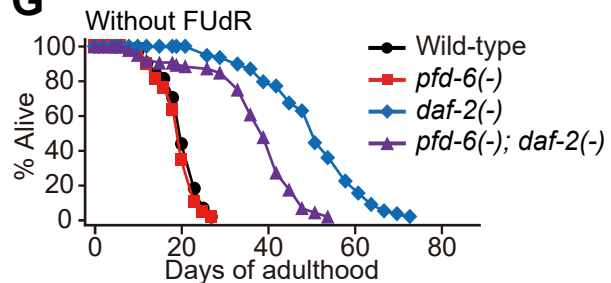

**H**

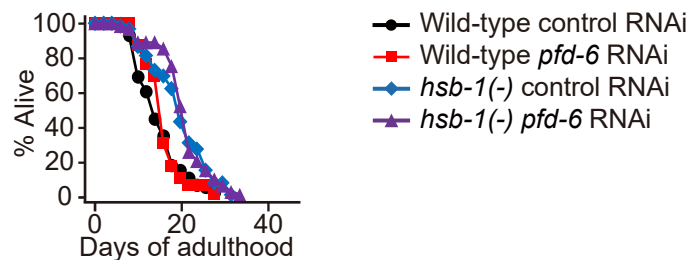

**Figure S2. Evolutionarily conserved PFD-6 is required for the long lifespan of *daf-2***

**mutants.** (A) Percent homozygous *pfid-6* deletion mutants that hatched were measured, by using two strong loss of function alleles of *pfid-6* that are balanced: *pfid-6(tm3759)/hT2[bli-4(e937) let-?(q782) qIs48[Pmyo-2::gfp; Ppes-10::gfp; Pges-1::gfp]]* and *pfid-6(tm3510)/hT2*. All the homozygous mutant worms that hatched arrested as L2 or L3 larvae. Error bars represent SEM using three biological repeats. (B) PFD-6 is conserved among various species. Amino acid sequence alignment of *C. elegans* PFD-6, *H. sapiens* PFDN6 (41%), *M. musculus* PFDN6 (41%), *D. melanogaster* CG7770 (36%) and *S. cerevisiae* YKE2 (36%) was generated using Clustal W2 and colored in box shades with asterisks (completely identical residues) or dots (similar or identical residues). (C) Shown is a schematic diagram of exon and intron regions of *pfid-6*. *pfid-6(gk493446)* mutation causes an amino acid substitution, T16 to I. (D) Phylogenetic tree of PFD-6 homologs in *C. elegans*, *D. melanogaster*, *S. cerevisiae*, *M. musculus* and *H. sapiens*. (E) Predicted structure of PFD-6 presents a coiled-coil structure that is involved in substrate-binding. (F and G) *pfid-6* RNAi (F) or *pfid-6* mutations (G) partially decreased the longevity of *daf-2* mutants in the absence of FUdR. (H) *pfid-6* RNAi did not affect the longevity of *hsb-1(cg116)* (*hsb-1(-)*) mutants. See **Supplemental Table S3** for statistical analysis and additional repeats.

# Figure S3

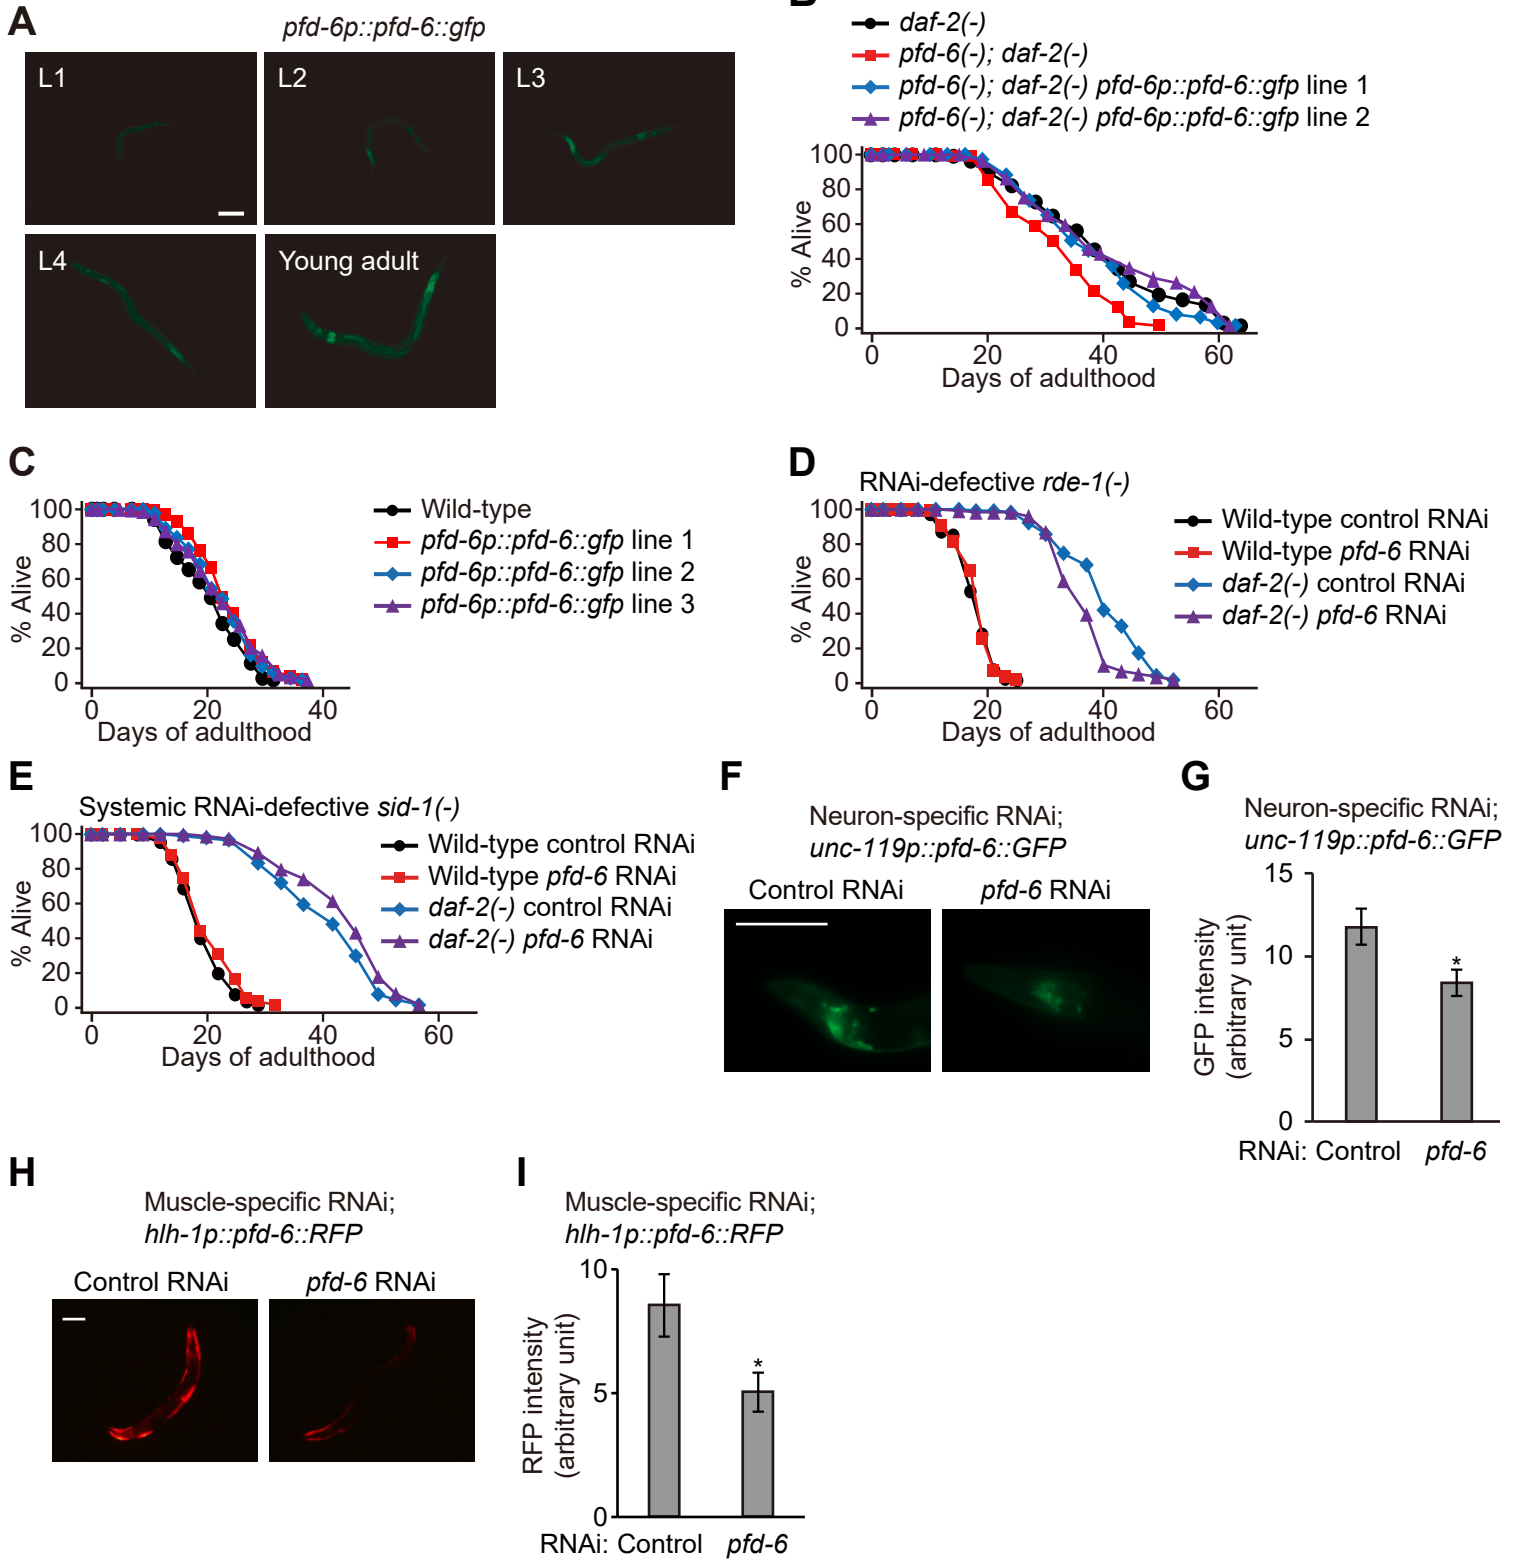

**Figure S3. The expression patterns of *pdf-6* during development and the effect of *pdf-6* transgenes and RNAi on lifespan.** (A) *pdf-6* was expressed in multiple tissues throughout development (scale bar: 100  $\mu$ m). (B) Two different lines of *pdf-6p::pdf-6::gfp* transgenes restored long lifespan in *pdf-6(gk493446); daf-2(e1370)* (*pdf-6(-); daf-2(-)*) double mutants. (C) Three different lines of *pdf-6p::pdf-6::gfp* transgenes marginally affected the lifespan of wild-type. (D) *pdf-6* RNAi did not affect the lifespan of RNAi-defective *rde-1(ne219)* (*rde-1(-)*) mutants, but marginally decreased the lifespan of *rde-1(ne219); daf-2(e1370)* (*rde-1(-); daf-2(-)*) mutants (3 out of 4 trials) (E) The lifespan of systemic RNAi-defective *sid-1(pk3321)* (*sid-1(-)*) or *daf-2(e1370); sid-1(pk3321)* (*daf-2(-); sid-1(-)*) mutants was not changed by *pdf-6* RNAi. See **Supplemental Table S4** for statistical analysis and additional repeats. (F) Fluorescence images of *unc-119p::pdf-6::GFP* worms in neuron-specific RNAi backgrounds. (G) Quantification of panel F (n > 26 from three independent trials). Error bars represent SEM (two-tailed Student's *t*-test, \**p* < 0.05). Please note that the RNAi efficiency in our study is similar to that shown by a previous report that generated neuron-specific RNAi strain (Calixto et al. 2010). (H and I) Photographs of muscle-specific RNAi strain expressing *hlh-1p::pdf-6::RFP* (H), and quantification (n > 32, three biological repeats) (I).

# Figure S4

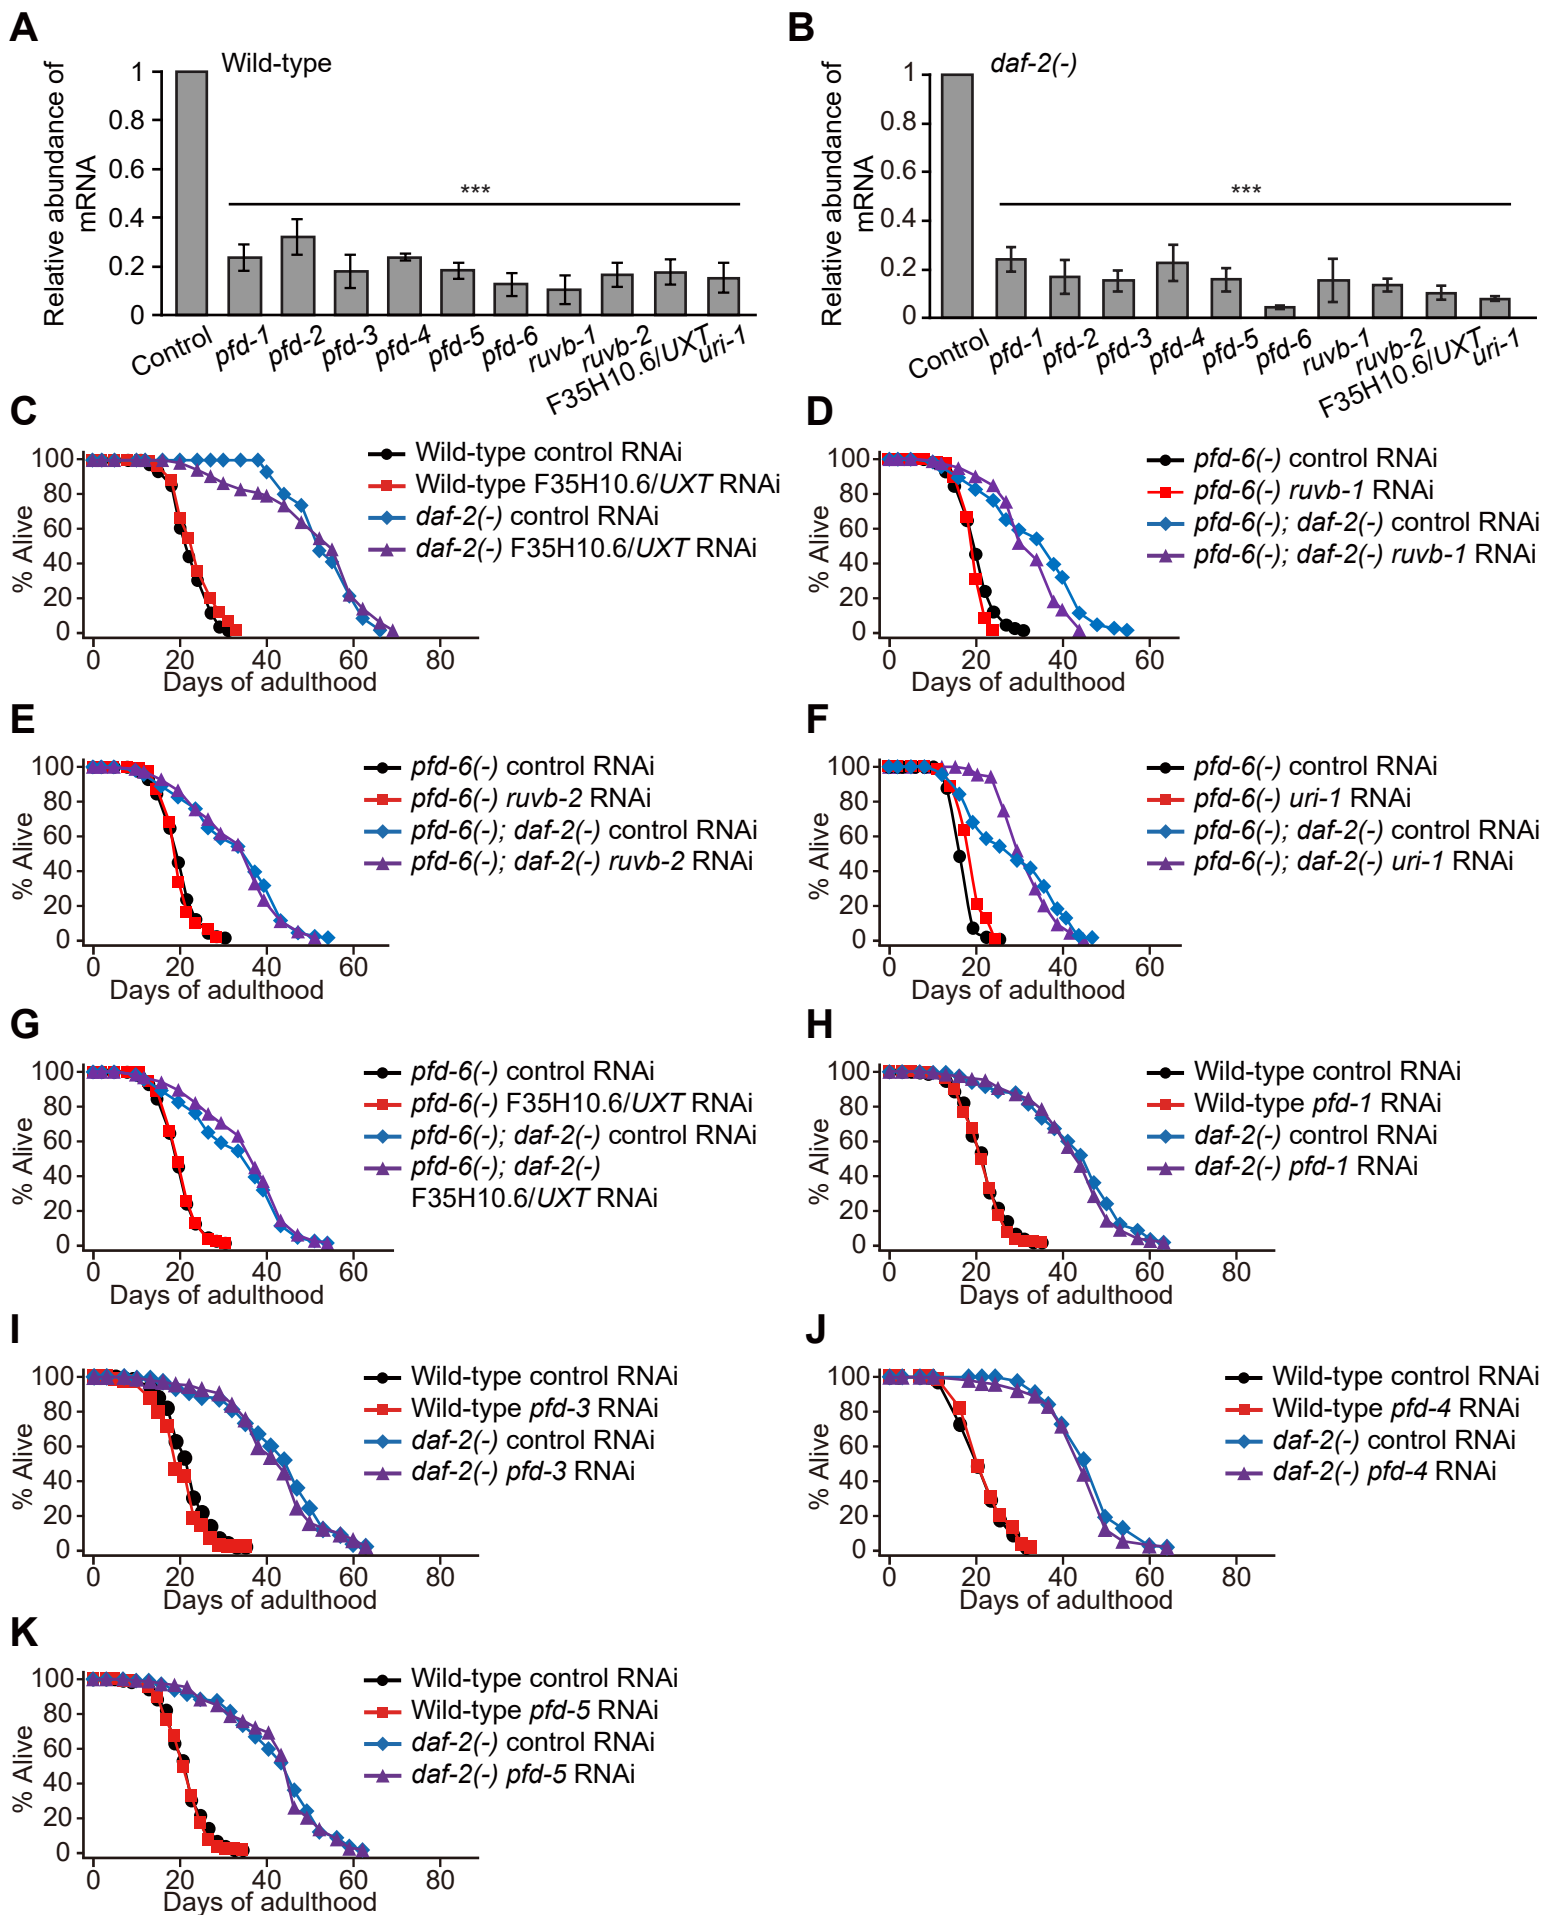

**Figure S4. The effects of RNAi targeting components of R2TP/prefoldin-like complex and prefoldin complex on lifespan.** (A and B) qRT-PCR results after knocking down each of the components in prefoldin and R2TP/prefoldin-like complexes in wild-type (A) and *daf-2(e1370)* (*daf-2(-)*) (B) animals. Data were obtained from three biological repeats. Error bars represent SEM (two-tailed Student's *t*-test, \*\*\**p* < 0.001) (C) *F35H10.6/UXT* RNAi did not influence the lifespan of wild-type or *daf-2(e1370)* (*daf-2(-)*) mutants. (D-G) Inhibition of *ruvb-1* (D), *ruvb-2* (E), *uri-1* (F, one out of two trials), or *F35H10.6/UXT* (G) using RNAi did not affect the lifespan of *pfid-6(gk493446)*; *daf-2(e1370)* (*pfid-6(-)*; *daf-2(-)*) animals. (H-K) RNAi targeting *pfid-1* (H), *pfid-3* (I), *pfid-4* (J) or *pfid-5* (K) had no effect on the lifespan of wild-type or *daf-2* mutant animals. See **Supplemental Table S5** for statistical analysis and additional repeats.



# Figure S5

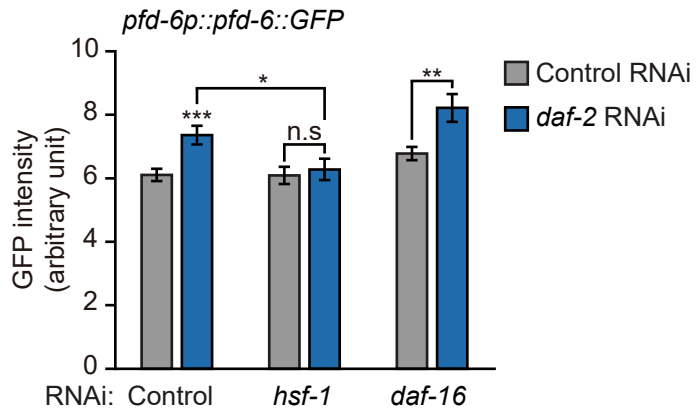

**Figure S5. *daf-2* RNAi increases PFD-6 protein levels in an *hsf-1*-dependent manner.**

Quantification of PFD-6::GFP levels in control RNAi- and *daf-2* RNAi-treated animals under control RNAi, *hsf-1* RNAi, or *daf-16* RNAi conditions (n > 25, three biological repeats). Error bars represent SEM, and *p* values were calculated by using two-tailed Student's *t*-test (n.s: not significant, \**p* < 0.05, \*\**p* < 0.01, \*\*\**p* < 0.001). Integrated *pdf-6::GFP* transgenic animals (IJ1249 *yhIs74[pdf-6p::pdf-6::GFP; odr-1p::RFP]*) were used. Here, we performed double RNAi experiments, as integrated *pdf-6::GFP* caused sterility in a *daf-2(e1370)* mutant background.

# Figure S6

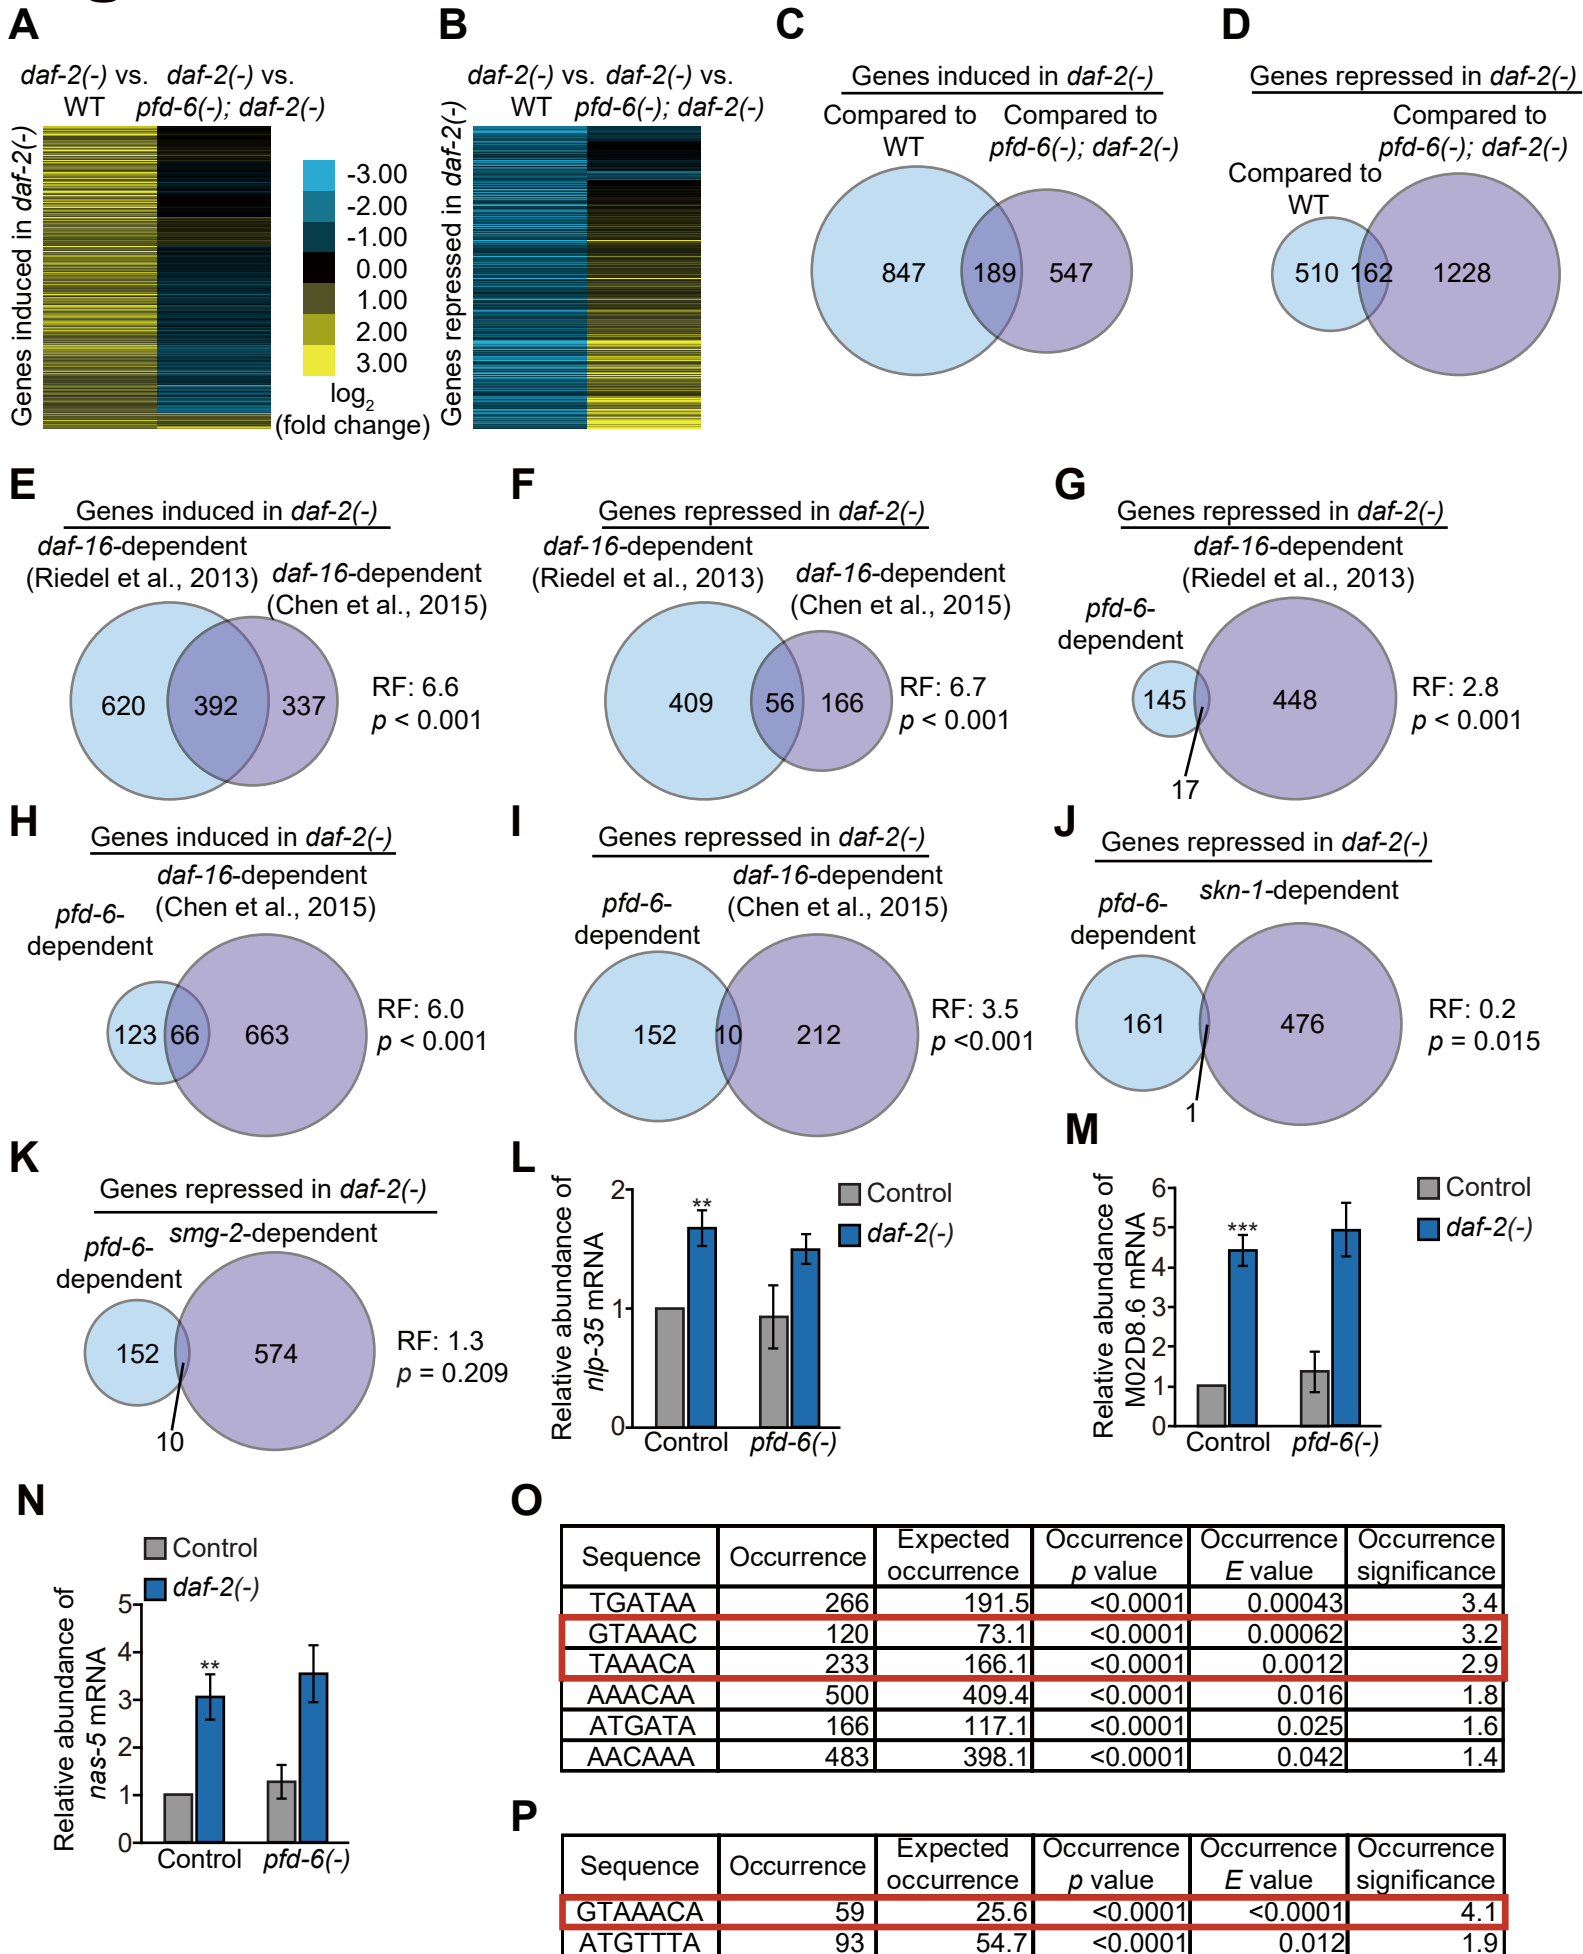

**Figure S6. The effects of genetic inhibition of *pfid-6* on the transcriptome of *daf-2* mutants.**

(**A** and **B**) Heat maps show different expression patterns between up- (**A**, fold change > 1.50 and  $p$  value < 0.05) and down- (**B**, fold change < 0.67 and  $p$  value < 0.05, left) regulated genes in *daf-2(e1370)* (*daf-2(-)*) mutants and wild-type animals compared with those in *pfid-6(-); daf-2(-)* double mutants. (**C** and **D**) Venn diagrams show that the expression of 189 genes was up-regulated (**C**) and that of 162 genes was down-regulated (**D**) by *daf-2(-)* mutations in a *pfid-6*-dependent manner (RF: representation factor).  $p$  values for overlap of Venn diagrams were calculated with hypergeometric probability test. (**E** and **F**) Venn diagrams showing induced (**E**) or repressed (**F**) genes by *daf-2(-)* mutations in a *daf-16*-dependent manner using two previously published RNA-seq. data (Riedel et al. 2013; Chen et al. 2015). (**G**) Venn diagrams show an overlap between genes repressed in *daf-2(-)* mutants that are dependent on PFD-6 and those that are dependent on DAF-16 (Riedel et al. 2013). (**H** and **I**) Venn diagrams indicate overlapping genes between PFD-6-dependent and DAF-16-dependent genes (Chen et al. 2015), whose levels are induced (**H**) or repressed (**I**) in *daf-2(-)* mutants. (**J** and **K**) Shown are the overlaps between PFD-6 targets and SKN-1 targets (Ewald et al. 2015) (**J**), or PFD-6 targets and SMG-2 targets (Son et al. 2017) (**K**), whose expression was repressed in *daf-2(-)* mutants. (**L-N**) mRNA levels of *nlp-35* (**L**), M02D8.6 (**M**) and *nas-5* (**N**) were measured by using qRT-PCR ( $n > 3$ , error bars represent SEM and  $p$  values were calculated by using two-tailed Student's  $t$ -test,  $**p < 0.01$ ,  $***p < 0.001$ ). (**O** and **P**) Shown are motifs containing oligolength of 6 (**O**) and 7 (**P**) that are significantly overrepresented in 800 bp upstream of the coding regions of *pfid-6*-dependent up-regulated genes in *daf-2(-)* mutants. We performed a DNA pattern search with known motifs of transcription factors in insulin/IGF-1 signaling pathway; DAF-16-associated sites (also known as PQM-1/GATA-like binding sites; GAKAAG: 41.3 %), DAF-16-binding element sites

(GTAAARA: 56.6 %), SKN-1-binding sites (WWTRTCAT: 41.8 %), and HSF-1-binding sites (GGGTGTC and TTCTAGAA: 2.1% and 6.3%, respectively).

# Figure S7

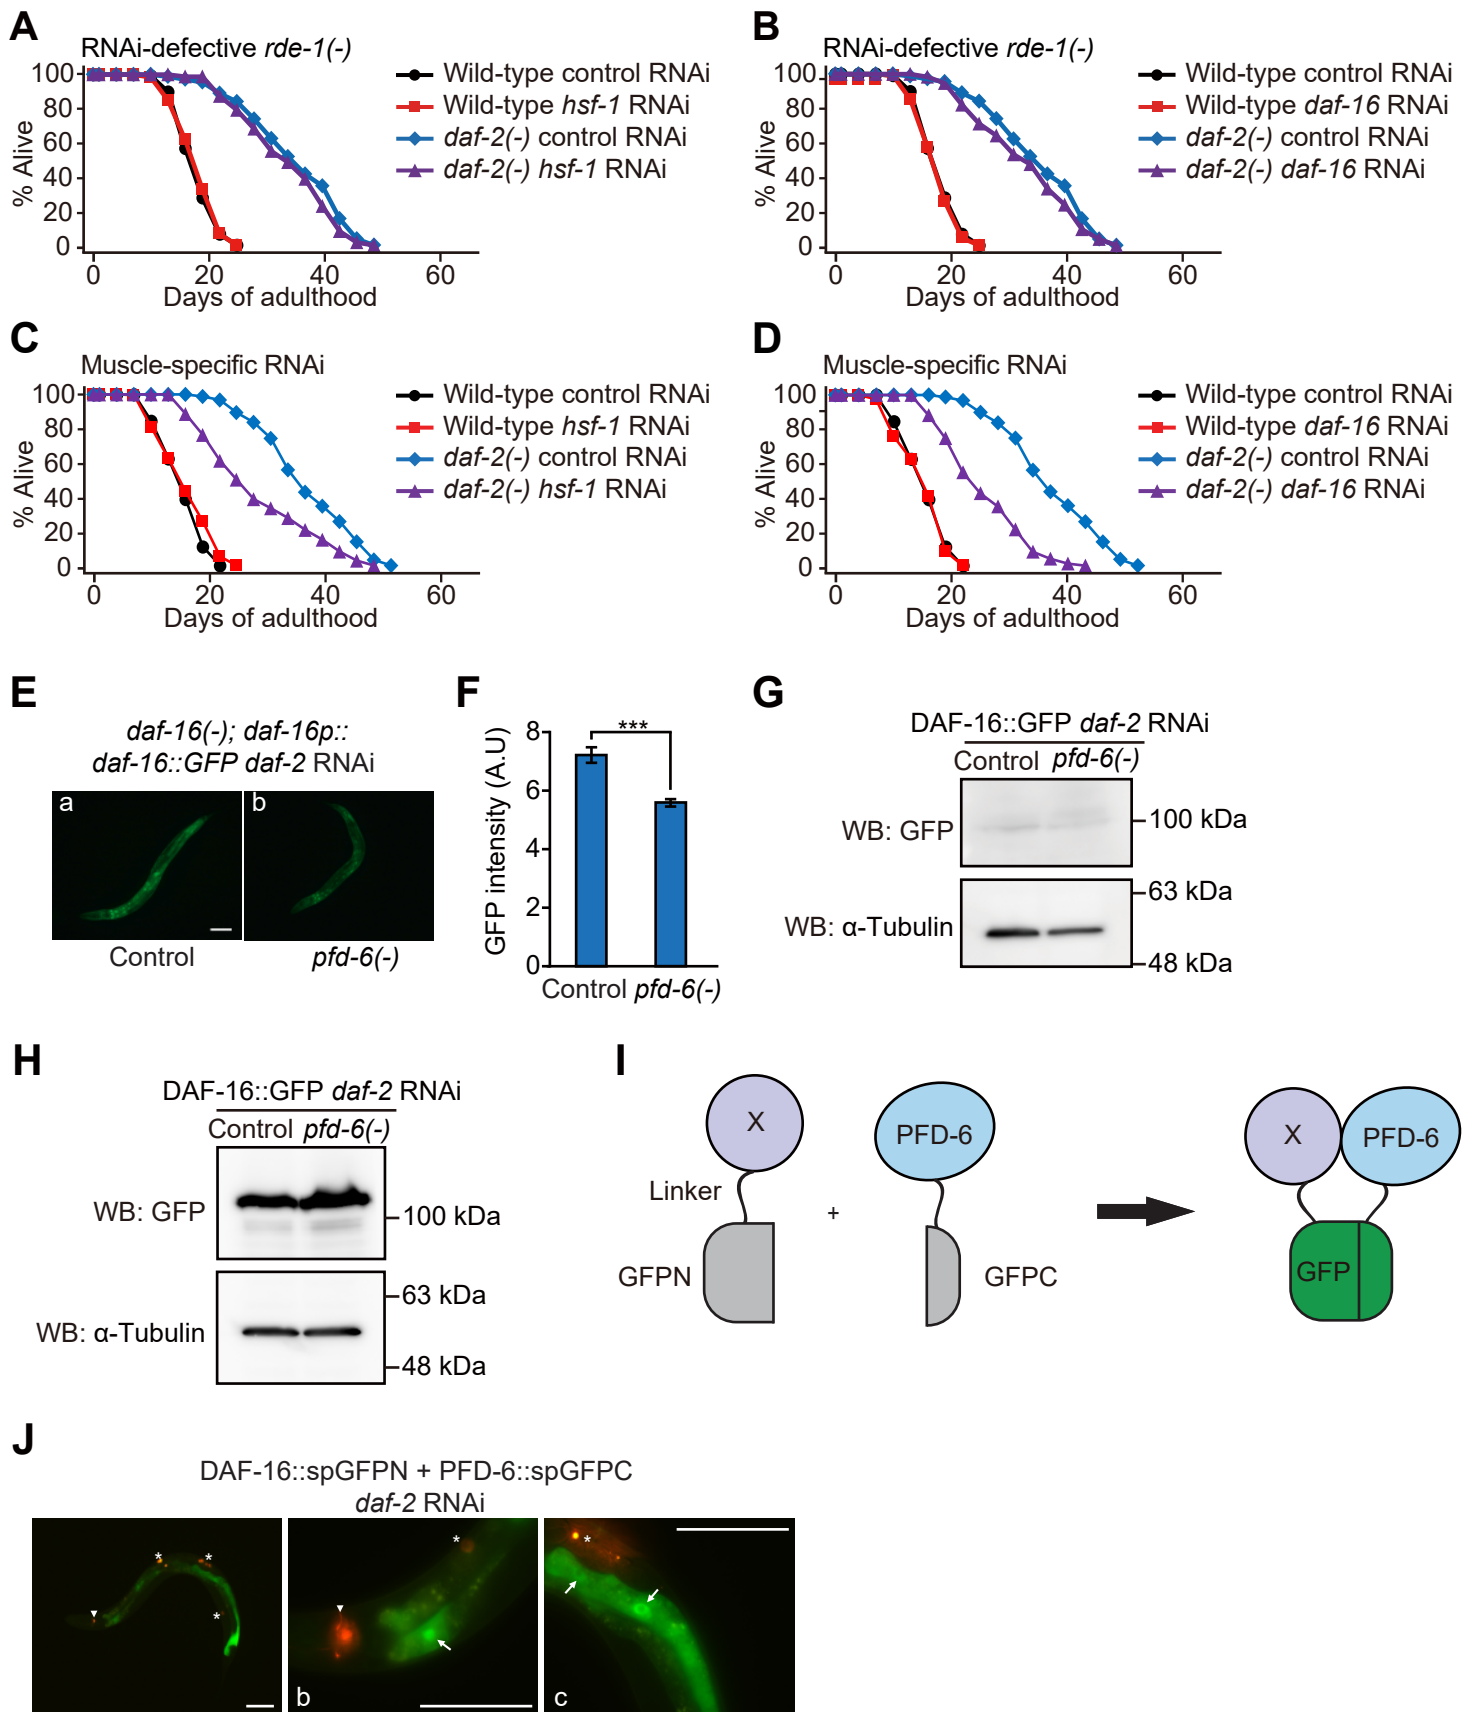

**Figure S7. Tissue-specific *hsf-1* and *daf-16* RNAi lifespan assays.** (A and B) *hsf-1* RNAi (A) and *daf-16* RNAi (B) did not affect the lifespan of RNAi-defective *rde-1(ne219)* (*rde-1(-)*) and *rde-1(ne219); daf-2(e1370)* (*rde-1(-); daf-2(-)*) mutants. (C and D) Muscle specific *hsf-1* RNAi (C) or *daf-16* (D) RNAi decreased the longevity of *daf-2(-)* mutants. See **Supplemental Table S6** for statistical analysis and additional repeats. (E) DAF-16::GFP levels were decreased by *pfid-6(gk493446)* (*pfid-6(-)*) mutations under *daf-2* RNAi-treated conditions. IJ1058 (*daf-16(mu86); muIs112[daf-16p::GFP::daf-16cDNA; odr-1p::RFP]*) (control) and IJ1230 *pfid-6(gk493446) daf-16(mu86); muIs112[daf-16p::GFP::daf-16cDNA; odr-1p::RFP]* (*pfid-6(-)*) were used. (F) Quantification of DAF-16::GFP levels in panel E (n > 22 from three independent experiments). Error bars indicate SEM (two-tailed Student's *t*-test, \*\*\* *p* < 0.001). Scale bars indicate 100 μm. (G) Western blot assays using IJ1058 and IJ1230 strains. DAF-16::GFP was barely detected. WB: Western blot. (H) Western blot assays using TJ356 strain (*zIs356[daf-16p::daf-16a/b::GFP; rol-6]*) and IJ1125 *pfid-6(gk493446); zIs356[daf-16p::daf-16::GFP; rol-6D]* indicated that mutations in *pfid-6* did not decrease DAF-16::GFP levels under *daf-2* RNAi conditions (three biological replicates). We speculate that the difference between the results shown in panels E and H may have originated from using two different *daf-16::GFP* transgenic strains. Therefore, it will be important to measure endogenous DAF-16 levels in future studies. (I) A schematic drawing showing a split GFP system for protein-protein interaction. PFD-6 fused with the C-terminal part of GFP and protein X fused with the N-terminal part of GFP are co-expressed. If PFD-6 and protein X interact with each other, green fluorescence is detected. (J) Fluorescence images of the N-terminal domain of split GFP fused with DAF-16 isoform a (DAF-16::spGFNP) and PFD-6 fused with the C-terminal domain of split GFP (PFD-6::spGFPC) in *daf-2* RNAi-treated conditions. Triangles indicate *odr-1p::RFP*, a co-injection marker for DAF-

16::spGFPN. Asterisks indicate *unc-122p::RFP*, a co-injection marker for PFD-6::spGFPC.

Arrows indicate DAF-16::GFPN and PFD-6:GFPC that bound in the nucleus.



# Figure S8

**A** *lifeact::eGFP*

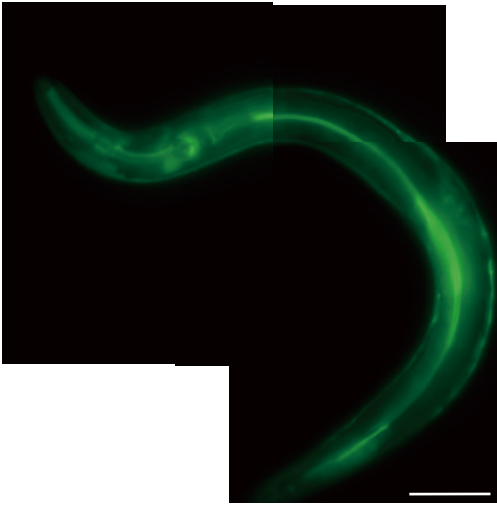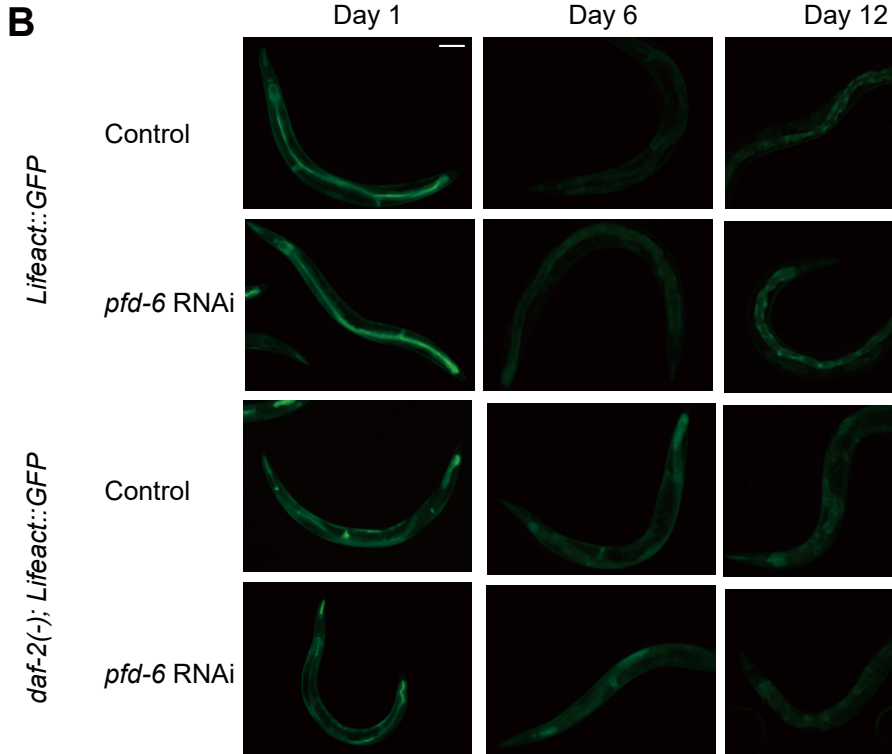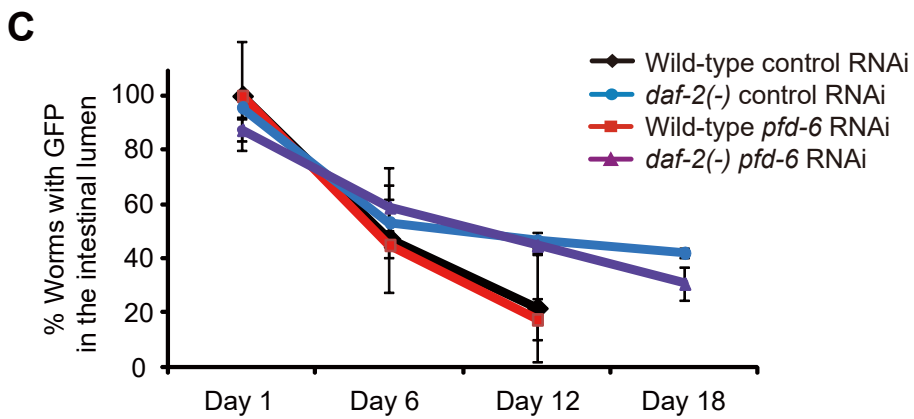

**Figure S8. *pfid-6* RNAi did not affect the enhanced maintenance of actin proteins in *daf-2* mutants during aging.**

(A) Lifeact::GFP, which binds actin filaments, was detected in the intestinal lumen. (B) Fluorescence images of *Lifeact::GFP*-expressing worms in wild-type or *daf-2(e1370)* (*daf-2(-)*) backgrounds treated with *pfid-6* RNAi during aging. (C) Quantification of panel B. Error bars represent SEM (n > 18 from three independent experiments).

# Figure S9

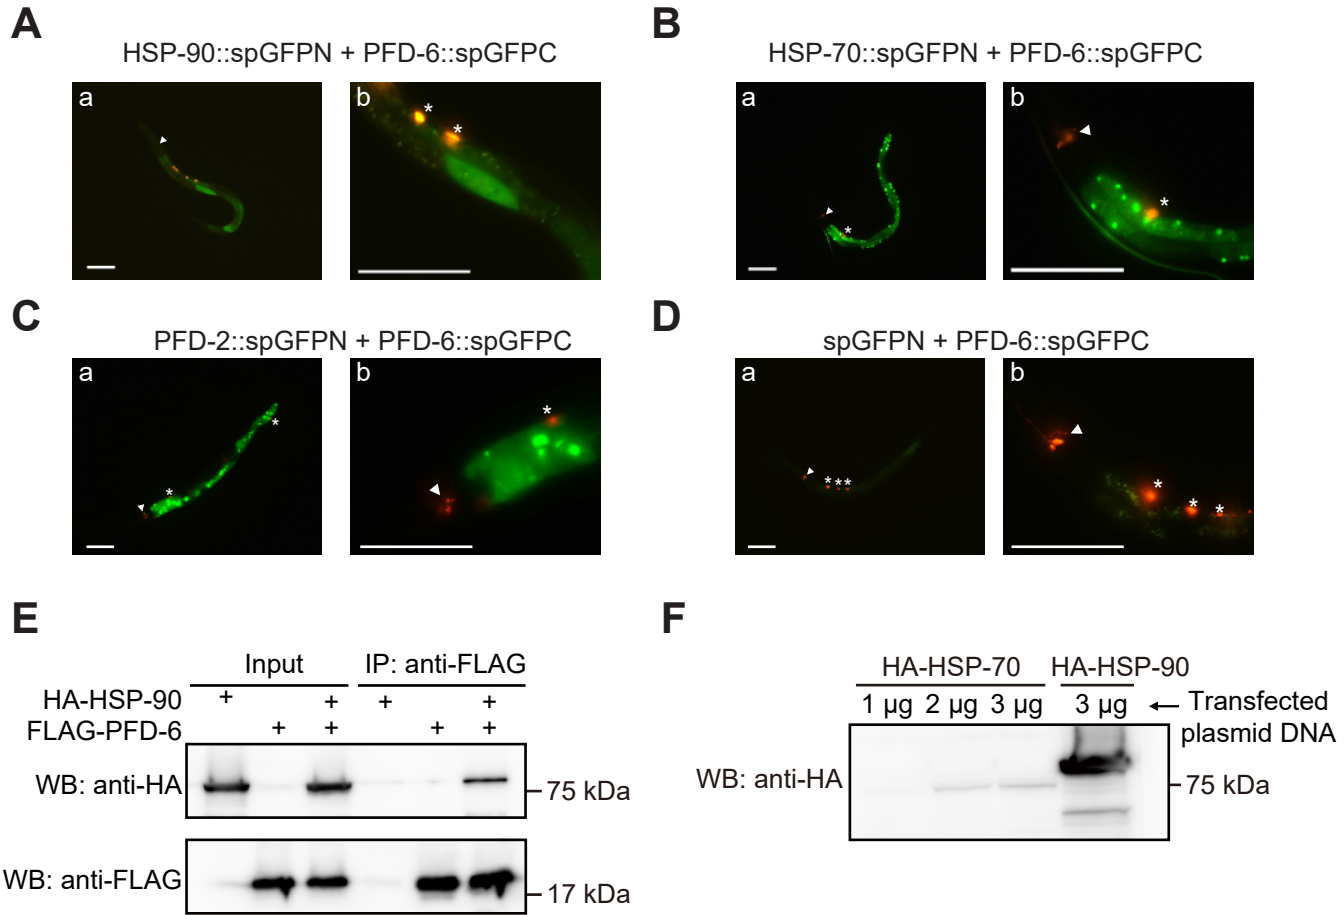

**Figure S9. PFD-6 binds HSP-90 and HSP-70.**

(**A-D**) Pictures of worms expressing C-terminal GFP fused with PFD-6 (PFD-6::GFPC) and N-terminal GFP fused with HSP-90::spGFPN (**A**), HSP-70 (HSP-70::spGFPN) (**B**), PFD-2::spGFPN (**C**) and spGFPN (**D**) (scale bars: 100  $\mu$ m). *vha-6* promoter, an intestine-specific promoter, was used for expressing split GFP-fused proteins. Triangles indicate *odr-1p::RFP*, a co-injection marker for HSP-70::spGFPN, HSP-90::spGFPN, spGFPN or PFD-2::spGFPN. Asterisks indicate *unc-122p::RFP*, a co-injection marker for PFD-6::spGFPC. (**E**) Co-immunoprecipitation (Co-IP) assays with HA-HSP-90 and FLAG-PFD-6 using HEK 293T cells (three independent repeats). WB indicates Western blot. (**F**) Western blot assays were performed to determine the expression of HA-HSP-70 in cultured mammalian cells. The level of HSP-70 was very low, and therefore we were not able to perform co-immunoprecipitation assay with HSP-70. We speculate that codon usage or other unknown factors may have affected the expression of *C. elegans* HSP-70 in cultured mammalian cells. HA-HSP-90 was used as a positive control.

## Supplemental references

- Calixto A, Chelur D, Topalidou I, Chen X, Chalfie M. 2010. Enhanced neuronal RNAi in *C. elegans* using SID-1. *Nature methods* **7**: 554-559.
- Chen AT, Guo C, Itani OA, Budaitis BG, Williams TW, Hopkins CE, McEachin RC, Pande M, Grant AR, Yoshina S et al. 2015. Longevity Genes Revealed by Integrative Analysis of Isoform-Specific daf-16/FoxO Mutants of *Caenorhabditis elegans*. *Genetics* **201**: 613-629.
- Ewald CY, Landis JN, Porter Abate J, Murphy CT, Blackwell TK. 2015. Dauer-independent insulin/IGF-1-signalling implicates collagen remodelling in longevity. *Nature* **519**: 97-101.
- Riedel CG, Downen RH, Lourenco GF, Kirienko NV, Heimbucher T, West JA, Bowman SK, Kingston RE, Dillin A, Asara JM et al. 2013. DAF-16 employs the chromatin remodeller SWI/SNF to promote stress resistance and longevity. *Nature cell biology* **15**: 491-501.
- Son HG, Seo M, Ham S, Hwang W, Lee D, An SW, Artan M, Seo K, Kaletsky R, Arey RN et al. 2017. RNA surveillance via nonsense-mediated mRNA decay is crucial for longevity in daf-2/insulin/IGF-1 mutant *C. elegans*. *Nature communications* **8**: 14749.
