# Supplementary material for: BAP1 regulation of the key adaptor protein NCoR1 is critical for γ-globin gene repression
Source: PubMed Central journal article supplement — Genes Dev. 2018 Dec 1;32(23-24):1537–49. doi: 10.1101/gad.318436.118 (PMC6295165; doi:10.1101/gad.318436.118), 2018-12-01
Supplement: supp_gad.318436.118_Supplemental_Information.pdf [file supp_gad.318436.118_Supplemental_Information.pdf]

## Supplemental Information

**Supplemental Figure 1. Expression of fusion proteins in *Saccharomyces cerevisiae* L40 for yeast two-hybrid experiments.** Western blots were used to confirm the expression of (A) VP16 and (B) LexA fusion proteins in yeast using anti-VP16 activation domain or anti-LexA DNA binding domain antibodies, respectively. Expression of phosphoglycerate kinase 1 (PGK1) detected using an anti-PGK1 antibody was used as the internal control. \* indicates the position of the expected fusion protein. White spaces between lanes were inserted to indicate the transition from non-continuous lanes or lanes spliced in from different gels. FL, full length; aa, amino acid. Expression of LexA-NCoR1-RD1, LexA-NCoR1- RD2/3, LexA-NCoR1-C and LexA-Sin3A are not shown.

**Supplemental Figure 2.** Representative TR2, TR4 and NcoR1 co-occupancy near the RNA catabolism-related genes DCP1A (mRNA-decapping enzyme 1A), AUH (AU RNA binding protein/enoyl-CoA hydratase) and AGO1 (Argonaute-1), and in the vicinity of the cell proliferation-related E2F transcription factor family genes.

**Supplemental Figure 3.** HCF1 and NCoR1 interaction is independent of TR4 binding. Co-immune precipitation of HCF1 followed by western blot of HCF1 or NCoR1 in the NCoR1 CoRNR site mutant HUDEP-2 cell clone 1 (see text).

**Supplemental Figure 4.** An anti-ubiquitin antibody immunoprecipitates NCoR1 protein in wild-type HUDEP2 cells. Western blots of immune precipitated anti-ubiquitin extracts from wild type HUDEP-2 cells were interrogated with anti-ubiquitin (top) or NCoR1 (bottom panel) antibodies.

**Supplemental Figure 5.** Proteasome inhibitor Lactacystin (Lac) treatment accumulates protein ubiquitination in HUDEP2 cells in a dose-dependent manner.

**Supplemental Figure 6.** *BAP1* heterozygous knockout induces  $\gamma$ -globin synthesis in HUDEP-2 cells. (A) Confirmation of the targeted mutation in *BAP1*<sup>+/-</sup> clones by Sanger sequencing. The wild type allele in both clones (1A1 and 3C2)

are not shown. (B). Heterozygous knockout of BAP1 significantly induced  $\gamma$ -globin, but not adult  $\beta$ -globin, in mutant HUDEP-2 cells. (\*\* $p < 0.01$ ; \*\*\* $p < 0.001$ ; unpaired Student's *t*-test).

**Supplemental Figure 7.** Cell growth is slowed in HUDEP-2 cells bearing TR4 interaction-deficient mutations. (\*\* $p < 0.01$ ; \*\*\* $p < 0.001$ ; unpaired Student's *t*-test).

**Supplemental Table 1.** Proteins identified by BioID mass spectrometry. The total proteins identified from mass spectral analysis from control and TR4-BirA\* HUDEP-2 labeling experiments (3 each) is shown. **Accession:** UniprotKB protein accession number. **Description:** UniprotKB protein description. Sum PEP Score: protein score calculated as the negative log of the Posterior error probability (PEP) values of connected PSMs. Coverage: The percent calculated by dividing the number of amino acids in all found peptides by the total number of amino acids in the entire protein sequence. #Peptides: The number of distinct peptide sequences in the protein group. #PSMs: Peptide Spectrum Matches, the total number of identified peptide sequences for the proteins. #Unique Peptides: The number of unique peptide sequences identified of the proteins. #AAs: Number of amino acids of the proteins. MW [kDa]: Molecular weight of the proteins. calc. pI: calculated isoelectric point. Area: average of the peptide peak areas assigned to the protein. emPAI: Exponentially modified protein abundance index. Score: The protein score, which is the sum of the scores of the individual peptides calculated by Proteome Discoverer (v2.1, Thermo Scientific).

**Supplemental Table 2.** Primers used in this study.

**Supplemental Table 3.** Antibodies used in this study.

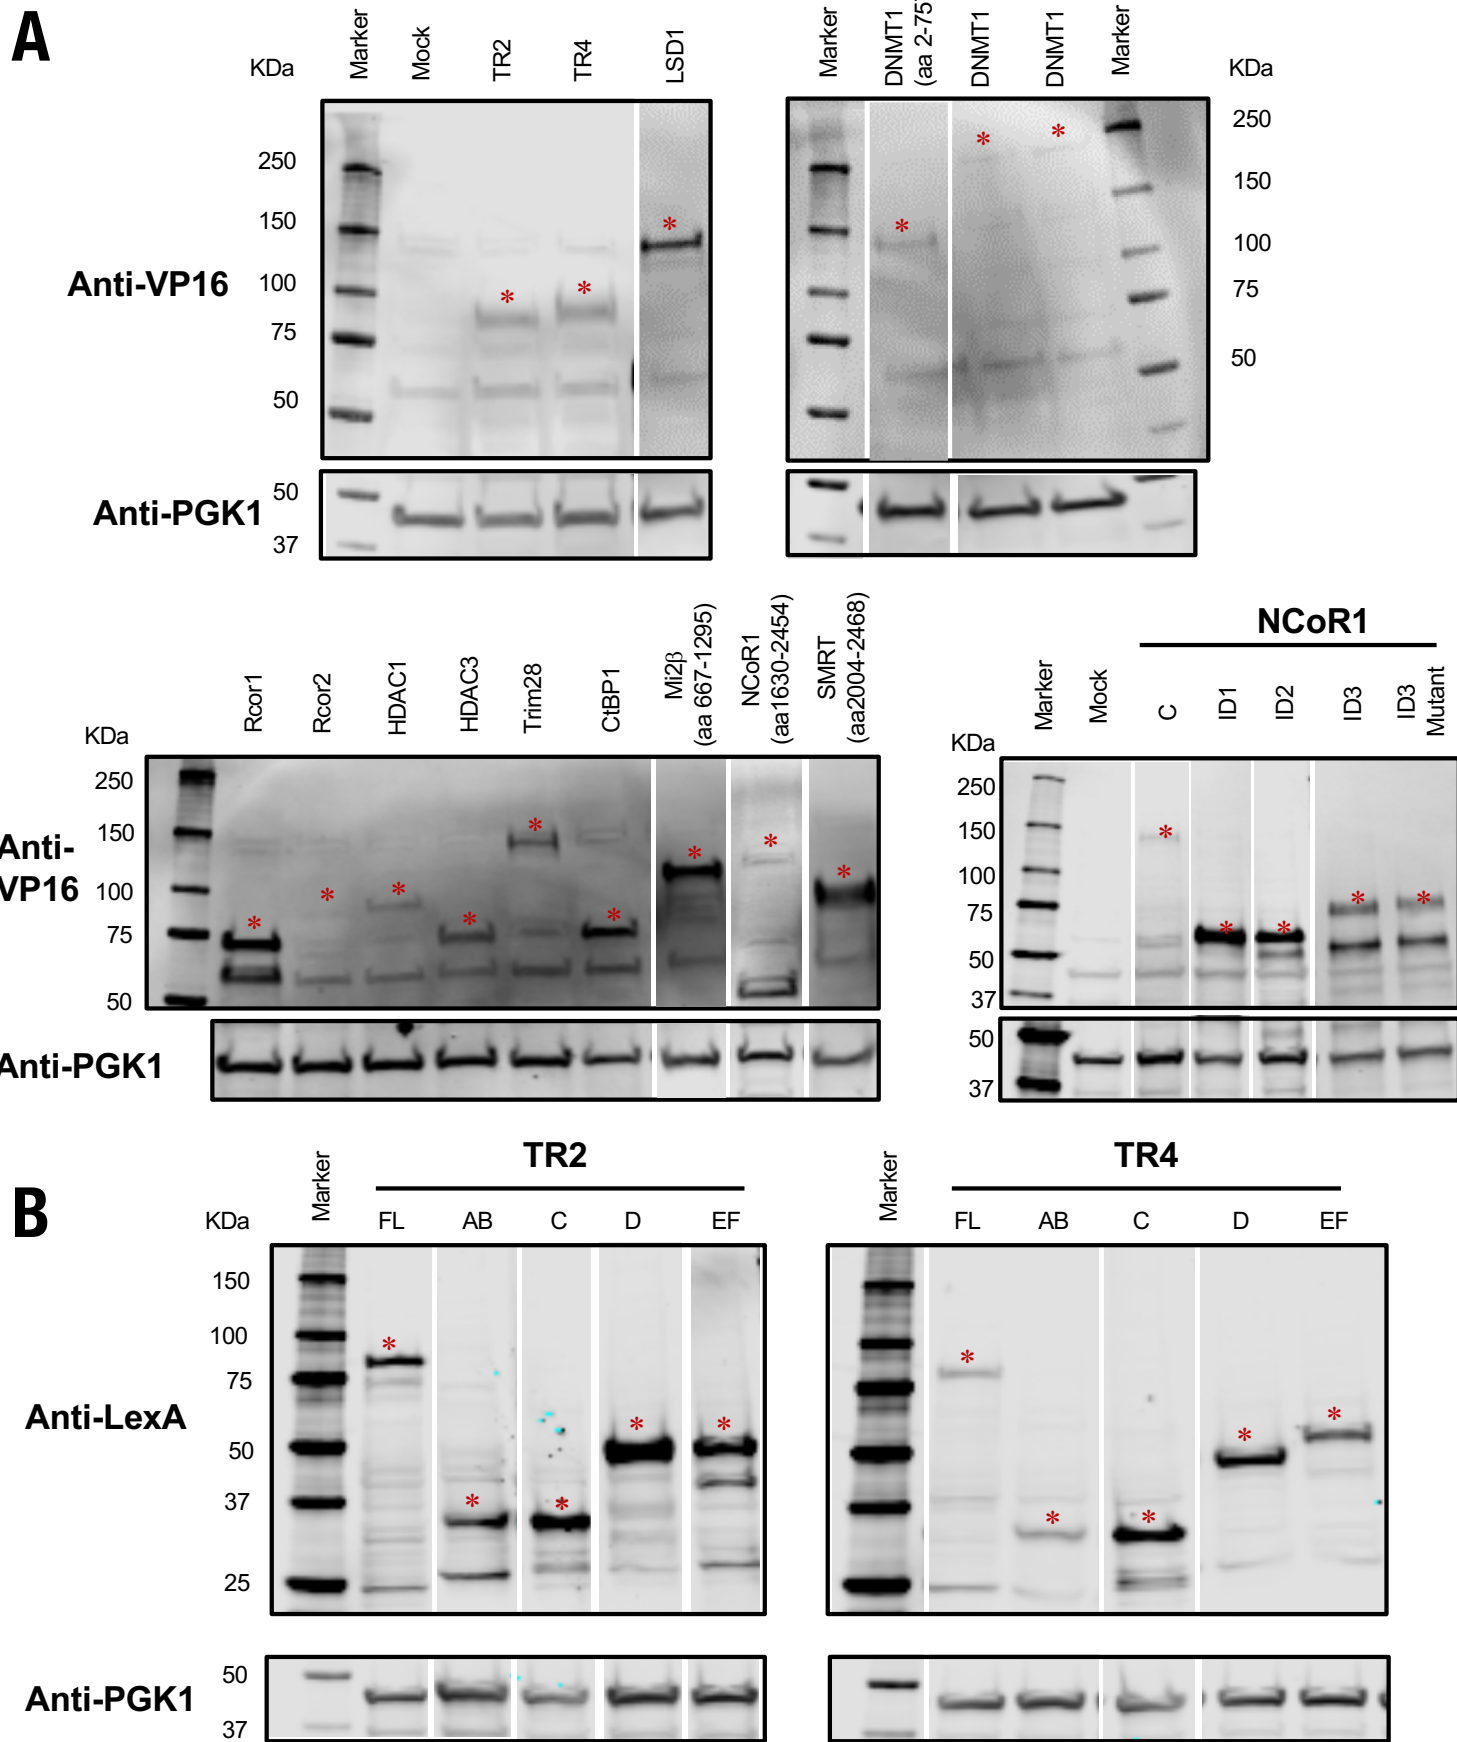

Supplemental Figure 1.

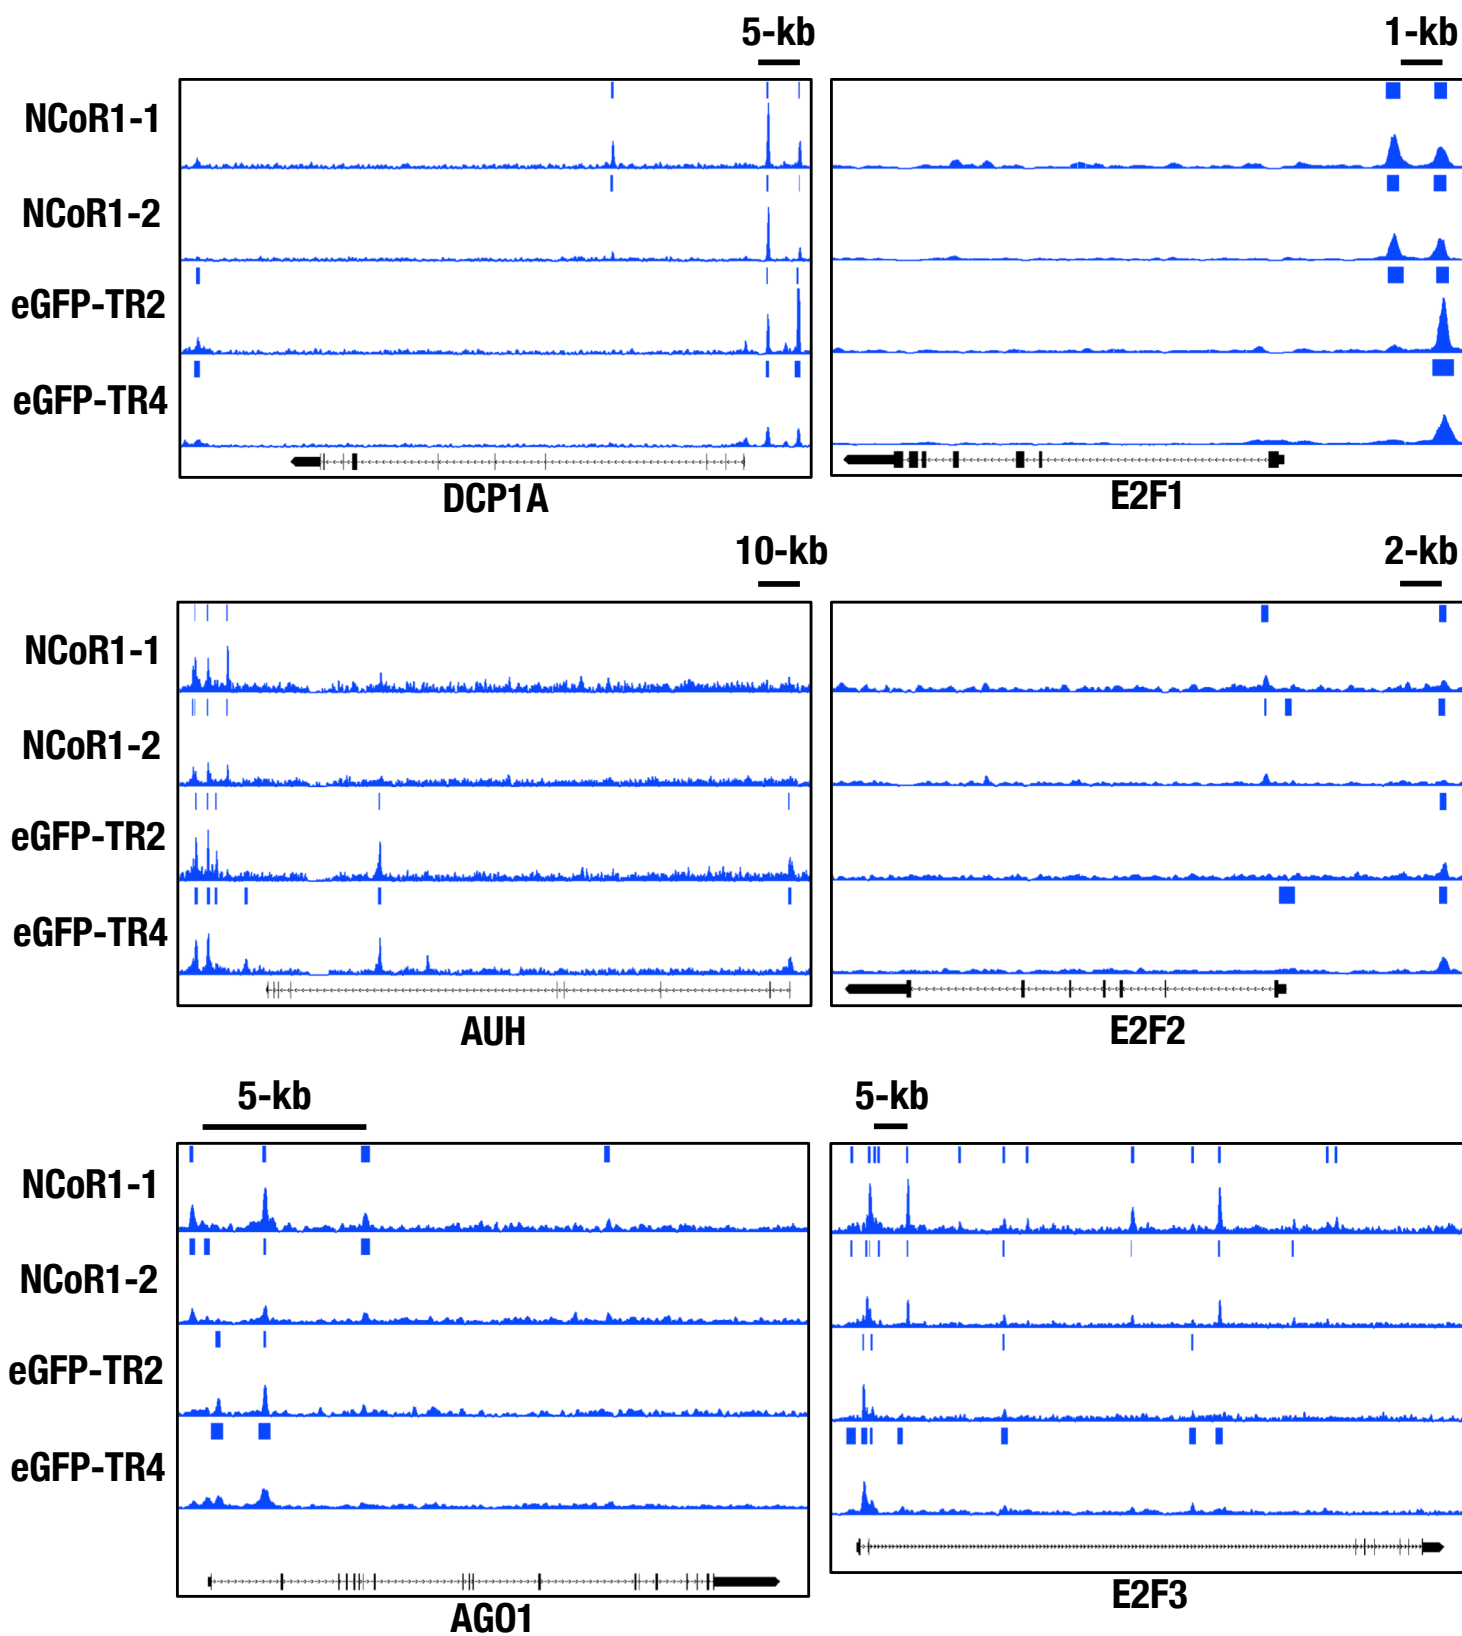

Supplemental Figure 2.

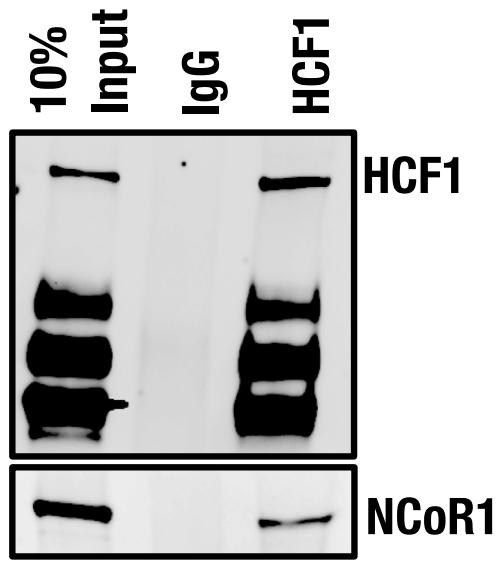

Supplemental Figure 3.

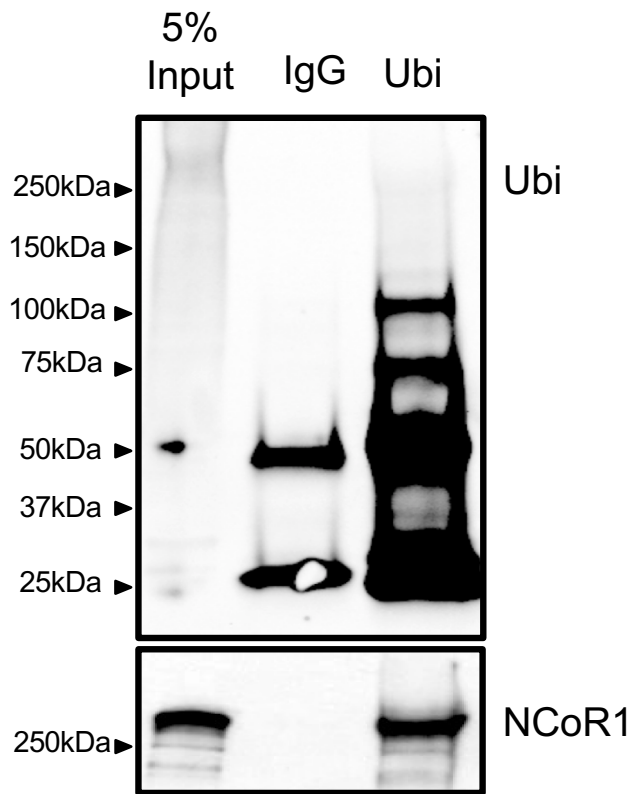

Supplemental Figure 4.

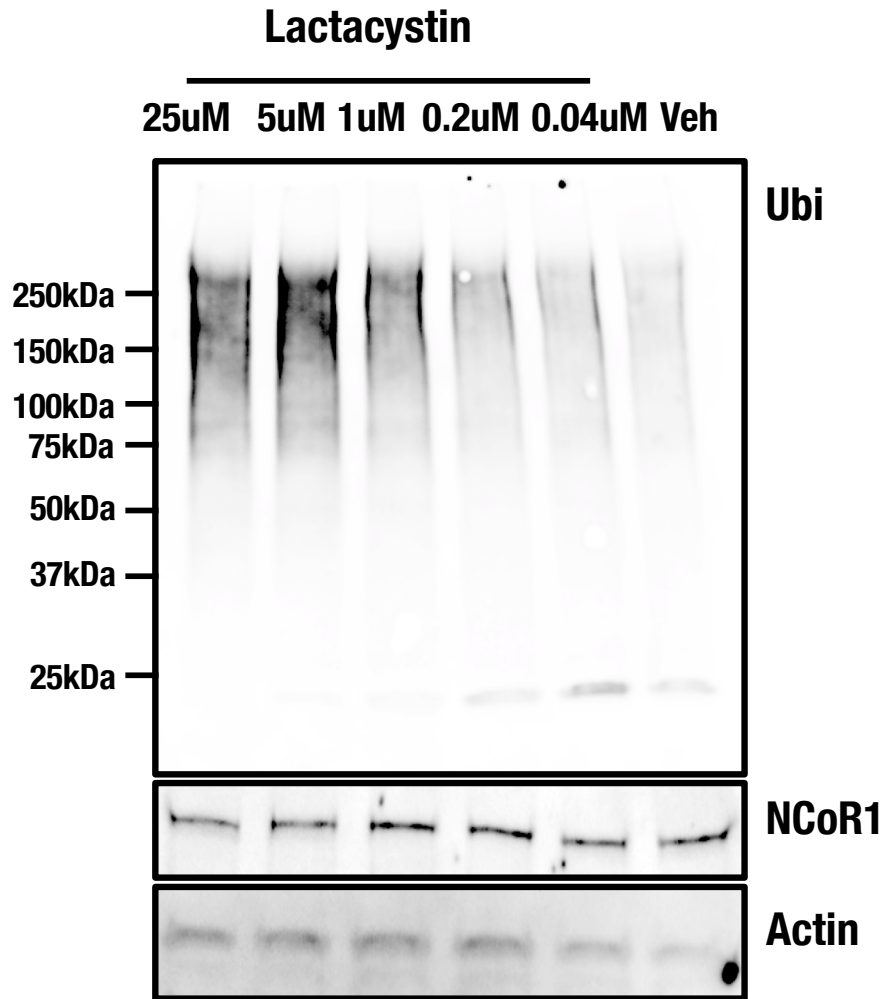

Supplement Figure 5.

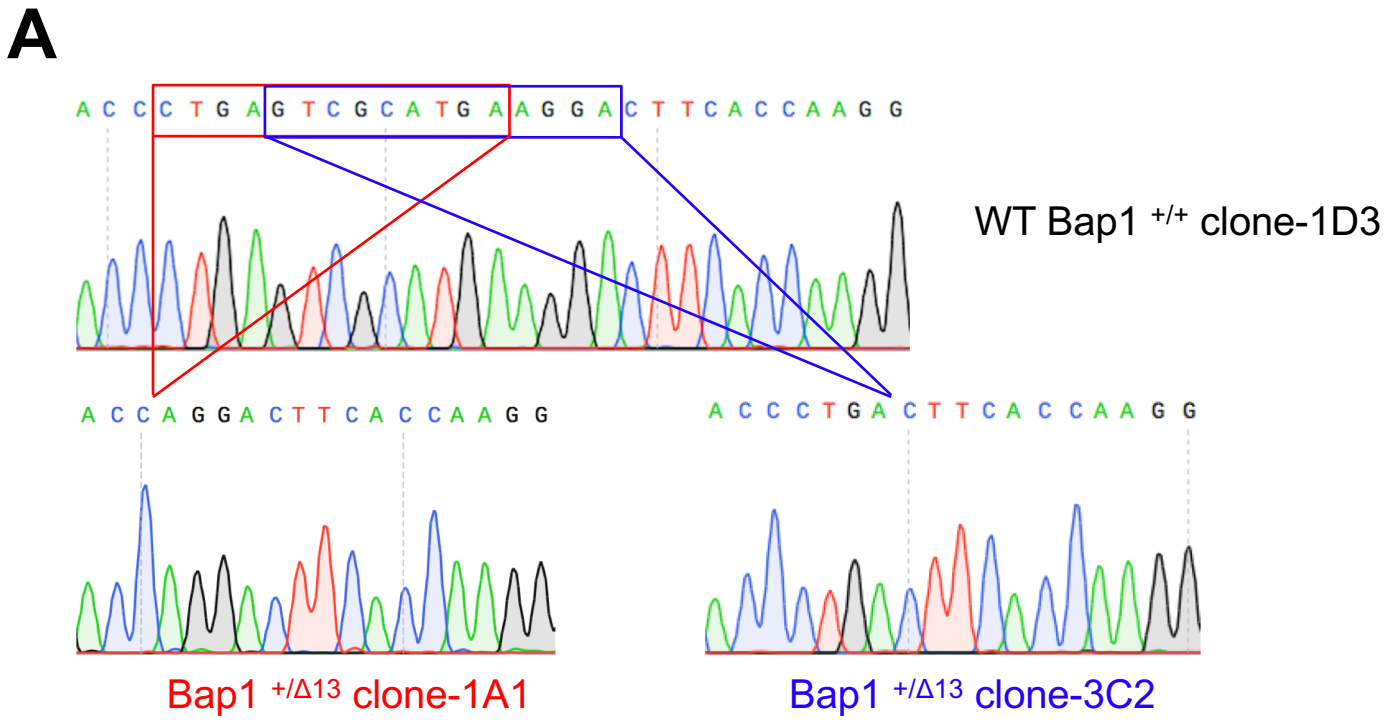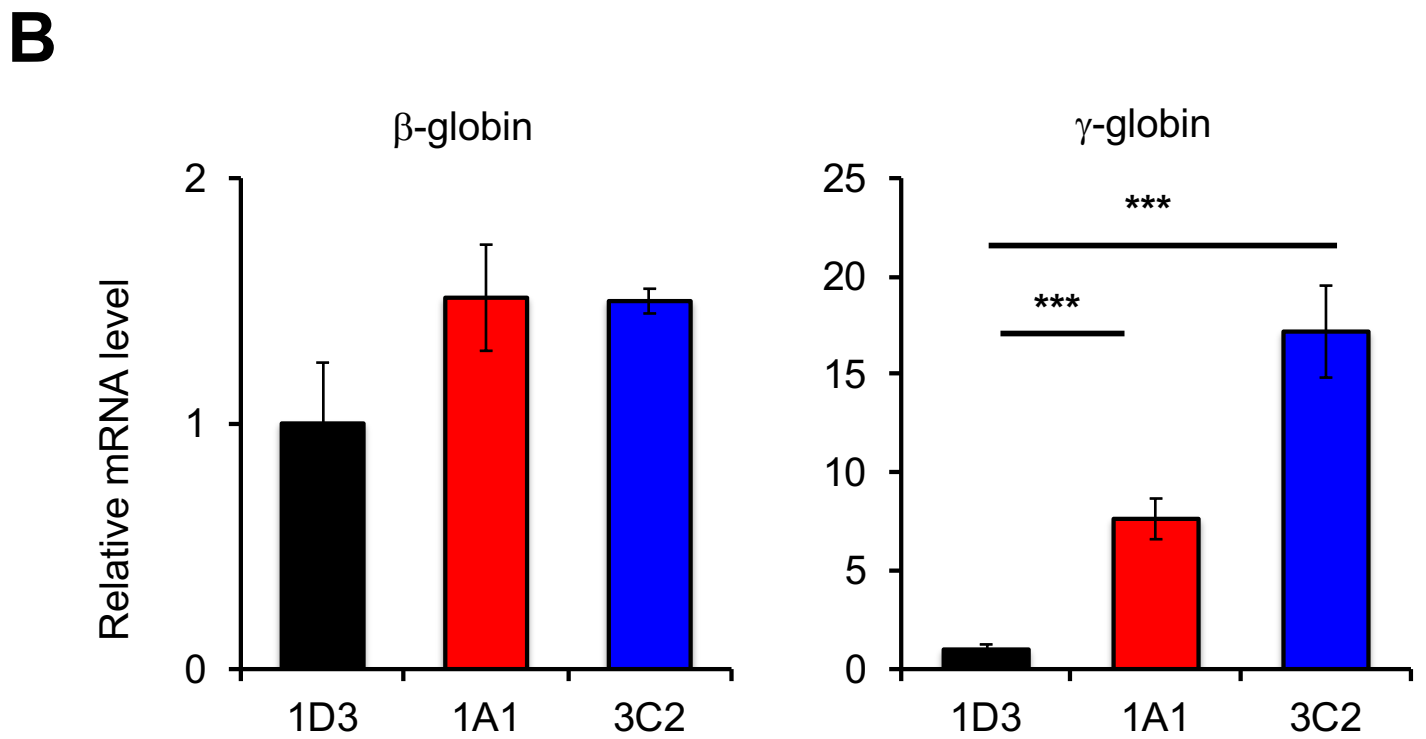

Supplemental Figure 6.



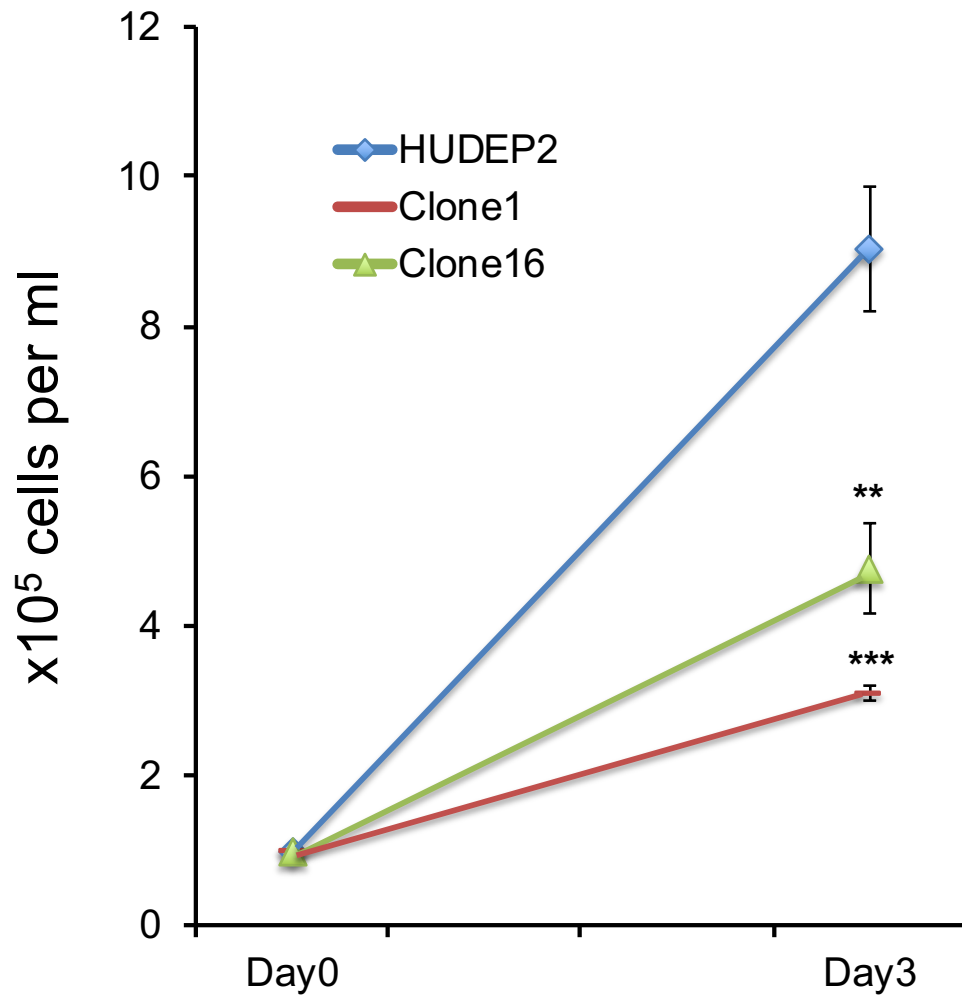

Supplement Figure 7.

| Genes/Targets           | Primer sequence (5'→3')  | Application |  |
|-------------------------|--------------------------|-------------|--|
| Human $\beta$ -globin   | AGGAGAAGTCTGCCGTTACTG    | qRT-PCR     |  |
|                         | CCGAGCACTTTCTTGCCATGA    |             |  |
| Human $\gamma$ -globin  | TGGATCCTGAGAACTTCAAGC    |             |  |
|                         | CACTGGCCACTCCAGTCAC      |             |  |
| Human OAZ1              | GACAGCTTTGCAGTTCTCCTGG   |             |  |
|                         | TTCGGAGCAAGGCGGCTC       |             |  |
| Human BAP1              | TGATGAGGATGACTATGAGGATG  |             |  |
|                         | GCTTCCCTGTTCCCTTCC       |             |  |
| Human NCoR1             | TCGCTTCCACTGTTTCTGC      |             |  |
|                         | GGGCTTGACAGCTTCAACTT     |             |  |
| Mouse GAPDH             | TGGTGAAGGTCGGTGTGAAC     |             |  |
|                         | CCATGTAGTTGAGGTCAATGAAGG |             |  |
| Mouse $\beta$ -globin   | TTTAACGATGGCCTGAATCACTT  |             |  |
|                         | CAGCACAATCACGATCATATTGC  |             |  |
| Mouse $\beta$ h1-globin | TGGACAACCTCAAGGAGACC     |             |  |
|                         | ACCTCTGGGGTGAATTCCTT     |             |  |
| HS2                     | ATCTGGGCACACACCCTAAG     | ChIP assay  |  |
|                         | AAGCAAACCTTCTGGCTCAA     |             |  |
| Negative control locus  | ACAGAGGCCTCCTCAGTCAA     |             |  |
|                         | CATCAATGGCTGGTTCACAC     |             |  |
| ARHGAP42                | CCACATTGCTTGTGGGATTA     |             |  |
|                         | GCCGATAAGCAAATGAGAGG     |             |  |
|                         |                          |             |  |
|                         |                          |             |  |
|                         |                          |             |  |
|                         |                          |             |  |
|                         |                          |             |  |
|                         |                          |             |  |

Supplemental Table 2. Primers used in this study.

| Antibody (Species)     | Co-IP | WB | ChIP | Cat#       |
|------------------------|-------|----|------|------------|
| NCoR1 (Rabbit)         | +     |    | +    | A301-145A  |
| HCF1 (Rabbit)          | +     |    |      | A301-399A  |
| Ubi (Mouse)            | +     | +  |      | sc-8017    |
| HA (Rabbit)            |       | +  |      |            |
| HA (Goat)              | +     | +  |      | A00168     |
| LRF (Armenian hamster) |       | +  |      | 14-3309-80 |
| MYB (Mouse)            |       | +  |      | 05-175     |
| NCoR1 (Goat)           |       | +  |      | sc-1609    |
| TR4 (Rabbit)           |       | +  |      | Homemade   |
| TR4 (Goat)             |       | +  |      | sc-8620    |
| LSD1 (Rabbit)          |       | +  | +    | ab17721    |
| Dnmt1 (Mouse)          |       | +  |      | IMG-261A   |
| HDAC1 (Rabbit)         |       | +  |      | ab7028     |
| HCF1 (Goat)            |       | +  |      | AF6254     |
| BAP1 (Mouse)           |       | +  |      | sc-28383   |
| LaminB (Goat)          |       | +  |      | sc-6217    |
| LexA DBD (Rabbit)      |       | +  |      | 06-719     |
| VP16 AD (Mouse)        |       | +  |      | sc-7545    |
| PGK1 (Mouse)           |       | +  |      | ab113687   |
| Streptavidin           |       | +  |      | 926-32230  |

Supplement Table 3. Antibodies used in this study.
